# Supplementary material for: Alteration of bacterial community composition in the sediments of an urban artificial river caused by sewage discharge
Source: PeerJ. 2024 Feb 14;12:e16931. doi: 10.7717/peerj.16931 (PMC10874175; doi:10.7717/peerj.16931)
Supplement: Supplemental Information 1 [file peerj-12-16931-s001.xlsx]

## Sheet: Table S1
Supplementary Table S1 A brief overview of the sequencing data
Sample_ID	Raw PE	Qualified Tags	Effective Tags	Base (nt)	Avglen (nt)	GC	Q20	Q30
JHE1	85600	84172	61081	25776063	422	0.5365	0.9861	0.9524
JHE2	76231	74859	43800	18363889	419.27	0.5455	0.9871	0.9556
JHE3	76209	74889	51801	21623131	417.43	0.5331	0.9856	0.9507
JHE4	74713	73357	45855	19413549	423.37	0.5433	0.9862	0.9534
JHE5	74877	73549	41963	17571132	418.73	0.5427	0.9867	0.9544
JHW1	75838	74154	45335	18983282	418.73	0.5611	0.9854	0.9517
JHW2	75991	74586	49582	20630898	416.1	0.5288	0.9861	0.9528
JHW3	76329	74726	46536	19622642	421.67	0.5588	0.9865	0.954
JHW4	75474	74044	44407	18690295	420.89	0.5571	0.9864	0.9534
JHW5	89489	87343	62417	26044275	417.26	0.5604	0.9867	0.9548
Total	780751	765679	492777	/	/	/	/	/
Raw PE, the original paired-end reads obtained from the sequencing instrument.
Qualified Tags, the sequences after filtering for low quality and short length.
Effective Tags, the sequences used for subsequent analysis after filtering chimeric sequences.
Base, the number of bases in Effective Tags.
Avglen, the average length of Effective Tags.
GC, the content of GC bases in Effective Tags.
Q20, the percentage of bases in Effective Tags with a base quality score greater than 20 (sequencing error rate less than 1%).
Q30, the percentage of bases in Effective Tags with a base quality score greater than 30 (sequencing error rate less than 0.1%).

## Sheet: Table S2
Supplementary Table S2 Alpha diversity analysis of the sequencing data
Sample_ID	Chao1	Dominance	Good’s coverage	Observed species	Pielou E	Shannon	Simpson
JHE1	2231.68	0.015	0.99	1989	0.795	8.715	0.985
JHE2	2394.46	0.004	0.993	2327	0.877	9.813	0.996
JHE3	2482.4	0.008	0.991	2380	0.849	9.519	0.992
JHE4	2252.94	0.013	0.993	2183	0.802	8.895	0.987
JHE5	2751.76	0.002	0.994	2658	0.906	10.305	0.998
JHW1	2556.48	0.003	0.994	2495	0.898	10.129	0.997
JHW2	1998.6	0.007	0.992	1914	0.819	8.924	0.993
JHW3	3216.54	0.001	0.989	3075	0.922	10.684	0.999
JHW4	2798.56	0.002	0.992	2723	0.907	10.351	0.998
JHW5	4349.24	0.002	0.975	3760	0.901	10.696	0.998

## Sheet: Table S3
Supplementary Table S3 Relative abundance of species annotations at the phylum level
Taxonomy	JHE1	JHE2	JHE3	JHE4	JHE5	JHW1	JHW2	JHW3	JHW4	JHW5
Proteobacteria	0.501985	0.440826	0.311441	0.607746	0.341423	0.35614	0.227562	0.351751	0.460771	0.305503
Bacteroidota	0.192997	0.141068	0.135388	0.118864	0.143489	0.0476682	0.290883	0.0952396	0.0526706	0.0514765
Campylobacterota	0.00929482	0.0121995	0.204454	0	0.102211	0.00748749	0.0168146	0.00196869	0.00977893	0.000451832
Firmicutes	0.00464741	0.0117476	0.0219461	0.00619655	0.0128772	0.0255285	0.147426	0.00338874	0.006132	0.00135549
Acidobacteriota	0.0253026	0.0377602	0.0312086	0.0260771	0.0412458	0.13258	0.00887526	0.102888	0.0743263	0.118703
Halobacterota	0.0430854	0.071938	0.00868162	0.00435695	0.00213006	0.000774568	0.120413	0.000161368	0.00222688	0.00545425
Desulfobacterota	0.0350815	0.0493142	0.0888494	0.0368888	0.0556398	0.0408908	0.0390189	0.0560271	0.0572212	0.0437954
Crenarchaeota	0.00555107	0.00584154	0.0135227	0.01533	0.00777796	0.0826206	0.00396966	0.0227852	0.0526061	0.0860416
Chloroflexi	0.0345651	0.0411167	0.0274004	0.0386316	0.0675165	0.0265612	0.0263676	0.0411812	0.0332419	0.0448604
Verrucomicrobiota	0.00568017	0.0185251	0.0130386	0.0137486	0.0434726	0.0257544	0.0148136	0.0611909	0.0371793	0.0159432
Nitrospirota	0.0118444	0.0126513	0.0229466	0.0270776	0.0331773	0.0172019	0.00487333	0.051412	0.0411489	0.0597386
Gemmatimonadota	0.00158141	0.00432467	0.00325964	0.00509924	0.0154268	0.0446668	0.000839116	0.0274004	0.0217847	0.0223979
Myxococcota	0.0117476	0.0175569	0.00790705	0.0138131	0.0296595	0.0234952	0.00213006	0.0339842	0.0188801	0.0380184
Actinobacteriota	0.00164596	0.0186219	0.00532516	0.00848798	0.0152655	0.0316605	0.00435695	0.01462	0.0186542	0.0137486
Thermoplasmatota	0.00413103	0.00497015	0.0158464	0.00342101	0.00154914	0.000322737	0.0267549	0.000451832	0.000871389	0.0215265
Cyanobacteria	0.0212038	0.0242698	0.00103276	0.00406648	0.00555107	0.00480878	0.0204615	0.00271099	0.00206552	0.00258189
Latescibacterota	0	0.00222688	0.00164596	0.00271099	0.00290463	0.0234952	0.000935937	0.0175569	0.0101985	0.014265
Nanoarchaeota	0.0067452	0.010618	0.0138131	0.0114894	0.0177183	0.00587381	0.00345328	0.00413103	0.00961756	0.0213652
NB1-j	0	0.00164596	0.00100048	0.00109731	0.00229143	0.0152332	0.000225916	0.0198806	0.00852025	0.00890754
Sva0485	0.018396	0.00768114	0.00671293	0.0024528	0.00151686	0	0.00467968	0.00516379	0.00506697	0.00964983
Patescibacteria	0.0179442	0.0162659	0.010263	0.0085848	0.00887526	0.0161691	0.00384057	0.00755204	0.00729385	0.0132968
MBNT15	0.00267872	0.0012264	0.00335646	0.0041633	0.00316282	0.00635792	0.00106503	0.0127158	0.00887526	0.0179442
Spirochaetota	0.0144909	0.0102308	0.0067452	0.00300145	0.0120058	0.00313055	0.0096821	0.00413103	0.00364693	0.00309827
Methylomirabilota	0.00106503	0.00203324	0.00209779	0.00561562	0.00242053	0.013684	0.000451832	0.00893981	0.00677747	0.0137486
Bdellovibrionota	0.00187187	0.00939164	0.00325964	0.00629337	0.00242053	0.00374375	0.00135549	0.00451832	0.0107471	0.00503469
Zixibacteria	0.00193642	0.00109731	0.00451832	0.00177505	0.00232371	0.000161368	0.00148459	0.00322737	0.00303373	0.00487333
Planctomycetota	0.000580926	0.000419558	0.000129095	0.00035501	0.00171051	0.00329192	0.000225916	0.0041633	0.00138777	0.0012264
Fibrobacterota	0.0006132	0.00119413	0.00145232	0.00035501	0.00313055	0.000645474	0.00371147	0.00187187	0.00106503	0.00248507
Elusimicrobiota	0.00254962	0.00200097	0.0024528	0.00119413	0.00364693	0.00316282	0.0006132	0.00284008	0.00148459	0.00238825
Entotheonellaeota	0	6.45474e-05	0.000129095	9.6821e-05	3.22737e-05	0.0035501	0	0.000774568	0.000710021	0.00035501
Cloacimonadota	0	0.000871389	0.00316282	0.0018396	0	0	0.000451832	6.45474e-05	0	0
Euryarchaeota	0.00300145	0.00206552	0.000516379	0.000258189	0	0	0.00200097	0	0.000258189	0.000839116
Calditrichota	0.000161368	6.45474e-05	0.000677747	0.00035501	6.45474e-05	0.00264644	0.000258189	0.00193642	0.000677747	0.00103276
Fusobacteriota	9.6821e-05	6.45474e-05	0.00238825	9.6821e-05	9.6821e-05	0.00203324	0.00235598	0	0.000387284	0.000129095
Iainarchaeota	0.000322737	0.000290463	3.22737e-05	0	0	3.22737e-05	9.6821e-05	0	0	0.00232371
LCP-89	0.000419558	0.00154914	0.00216234	0	0.00100048	3.22737e-05	0.000742295	0.000580926	0.00112958	0.000548653
Deferrisomatota	0.000903663	0.000677747	0.00148459	0.00174278	0.000516379	0.000839116	0.00096821	0.000419558	0.00196869	0.00174278
Aenigmarchaeota	0.00116185	0.000677747	0.00158141	0	0.000225916	0	6.45474e-05	0.000225916	0.000419558	0.000677747
Nitrospinota	0	0.000806842	0.00135549	0.00154914	0.000225916	0	0	0.00116185	0.000516379	0.000677747
Sumerlaeota	0	0.000451832	6.45474e-05	0.000419558	0.000516379	0.00142004	3.22737e-05	0.000484105	0.000225916	0.000710021
Micrarchaeota	0.0006132	0.000516379	0.00106503	0.000129095	0.000322737	0	6.45474e-05	6.45474e-05	0.00125867	0.00096821
Dependentiae	0.000387284	0.000290463	0.000193642	6.45474e-05	0.000129095	0.000258189	9.6821e-05	3.22737e-05	0.000129095	0.00106503
Armatimonadota	0.000548653	0.000225916	0	0.000387284	0.000516379	0.00103276	9.6821e-05	0.0006132	0.000322737	0.000839116
Hydrogenedentes	9.6821e-05	6.45474e-05	6.45474e-05	0.000225916	0.000516379	9.6821e-05	0	0.00096821	0.000387284	9.6821e-05
TA06	0	0.000258189	0.000387284	0	0.000290463	0	0	0.000645474	0.000225916	0.000903663
WS2	0.000129095	0.000419558	6.45474e-05	0	9.6821e-05	0	9.6821e-05	0.000322737	0.000839116	0.000548653
SAR324_clade(Marine_group_B)	9.6821e-05	0.000129095	6.45474e-05	0.00035501	0.000387284	0.000645474	6.45474e-05	0.000806842	0.000258189	0.000419558
RCP2-54	0	0	0	0.000516379	0	0.000516379	0	0.000322737	0.00035501	0.000806842
Hadarchaeota	0.000806842	0	0	0.000129095	0	0	0	0	0	0
GAL15	0.000806842	0	0	0	0	0.000129095	0	0.000225916	6.45474e-05	0.000387284
Modulibacteria	6.45474e-05	0.000516379	0.000774568	0	0.000516379	0	3.22737e-05	0.000225916	0.000161368	0
Caldisericota	0.000774568	0.000322737	3.22737e-05	0.00035501	0.000193642	0	0.000516379	9.6821e-05	0	0
WPS-2	0	0	9.6821e-05	0	0.000451832	0.000258189	0	0.000742295	0	0.000161368
WOR-1	3.22737e-05	0.000193642	0.000516379	6.45474e-05	0.000129095	0	0.000129095	0.00035501	6.45474e-05	0.000677747
FCPU426	0.000225916	6.45474e-05	0.000225916	0	0.000645474	0.000451832	0	0.000516379	0	0.000516379
WS4	3.22737e-05	0	0	0	0	0.000516379	0	0	9.6821e-05	0
DTB120	0	0	0	0.000193642	0	0	0	0.000419558	0	0.000193642
Altiarchaeota	6.45474e-05	6.45474e-05	0	6.45474e-05	0	0	0	0	0	0.000387284
Dadabacteria	0	0	6.45474e-05	0	0	9.6821e-05	0	0	9.6821e-05	0.000387284
Synergistota	0	9.6821e-05	0	9.6821e-05	9.6821e-05	0	0.000387284	0	3.22737e-05	0
Acetothermia	0.000129095	0.000290463	0.000322737	0.000225916	0	0	0.000161368	0.000161368	0.000193642	0.00035501
TX1A-33	0	0	0	0.000322737	0	0	0	0	0	6.45474e-05
Fermentibacterota	0	0.000290463	3.22737e-05	0	0	0	9.6821e-05	0	0	0
Schekmanbacteria	0	0	0	0	3.22737e-05	0	0	0	0	0.000258189
Margulisbacteria	0.000161368	0	6.45474e-05	0	0.000193642	6.45474e-05	0	6.45474e-05	9.6821e-05	0.000225916
CK-2C2-2	0	0	0.000161368	0	0	6.45474e-05	0	0	0	0
Edwardsbacteria	0.000161368	0.000161368	0	0	0	0	0	0	3.22737e-05	0
Deinococcota	3.22737e-05	0	0	9.6821e-05	0	0	0	0	0	3.22737e-05
FW113	0	0	9.6821e-05	0	0	0	0	0	0	3.22737e-05
NKB15	6.45474e-05	0	0	0	0	0	0	0	0	0
Firestonebacteria	0	0	0	0	0	0	0	3.22737e-05	0	0
Others	0.00948846	0.00974665	0.0125222	0.0115217	0.010263	0.0222043	0.00400194	0.0238825	0.021817	0.0317573

## Sheet: Table S4
Supplementary Table S4 Relative abundance of species annotations at the genera level
Taxonomy	JHE1	JHE2	JHE3	JHE4	JHE5	JHW1	JHW2	JHW3	JHW4	JHW5
Sulfuricurvum	0.00832661	0.0120704	0.193513	0	0.0952074	0	0.00732613	0.00177505	0.00942391	0.000451832
Bacteroides	0.000161368	0	0	0.000129095	0	0.000451832	0.119477	0	0	0
Nevskia	0.102082	0	0	0.00810069	0	0.000871389	0	0	0.000839116	0.00438922
Pseudomonas	0.000806842	0.00138777	0.00200097	0.087623	0.00238825	0.00442149	0.00035501	0.00132322	0.0170405	0.00180733
Thioalkalispira-Sulfurivermis	0.0625141	0.000451832	0.00106503	0	0.000484105	0	0.000484105	0	0	0
Thiobacillus	0.0593513	0.0241084	0.0358561	0.00590608	0.0253671	0.000193642	0.00816524	0.0113603	0.00793933	0.00445377
Methanosarcina	0.000387284	0.00106503	6.45474e-05	0	0.000645474	9.6821e-05	0.0587058	0	0.000193642	0.000290463
Hydrogenophaga	0.0110699	0.0127481	0.00716476	0.053897	0.00626109	0.00374375	0.00325964	0.00180733	0.0255608	0.00442149
Methanosaeta	0.0177183	0.0536066	0.0079716	0.00145232	0.000774568	0.000322737	0.0456027	0.000129095	0.00145232	0.00448604
Nitrosarchaeum	0	0.000677747	0.0012264	0.000225916	0.00151686	0.0127158	0.000451832	0.00893981	0.0170082	0.0460545
MND1	0	0.00190415	0.00151686	0.00248507	0.0053897	0.0363724	0.000129095	0.0295627	0.0259803	0.0385025
Dechloromonas	0.0143618	0.0336937	0.0146845	0.0131031	0.0157818	0.00458286	0.0338874	0.00332419	0.00532516	0.000935937
Nitrospira	0.00584154	0.00758431	0.00609973	0.0172341	0.0228498	0.0155236	0.000871389	0.0257544	0.0144263	0.0285299
unidentified_Bathyarchaeia	0.000548653	0.00438922	0.0105535	0.000451832	0.00438922	0	0.00261417	0.00868162	0.00755204	0.0257867
Fontimonas	0.000225916	0	0	0.0246248	0.00100048	0.000225916	0	0.000580926	0.00203324	0.000322737
Insolitispirillum	0	0	3.22737e-05	0	0.00167823	0	0.0230434	0	0.000225916	0.000161368
unidentified_Chloroplast	0.020397	0.0211715	0.000225916	0.00277554	0.00451832	0.00254962	0.0192997	0.000839116	0.000387284	0.00187187
Paludibacter	0.000193642	0.000161368	0.000225916	0	6.45474e-05	0.000935937	0.0189447	0.000290463	6.45474e-05	0
Curvibacter	0.0185896	0.00432467	0.00455059	0.000935937	0.00177505	0.000193642	0.000742295	0.000580926	0.00154914	0.000935937
Nitrosomonas	0.0172987	0.00106503	0.000451832	0.00593836	0.00103276	0	9.6821e-05	0.000387284	0	0.000225916
Subgroup_10	0	0.000290463	0.00035501	0.000710021	0.00158141	0.00393739	9.6821e-05	0.00187187	0.00258189	0.0157173
Ellin6067	0.00393739	0.00700339	0.00309827	0.00590608	0.00768114	0.0047765	0.00119413	0.0147491	0.00751977	0.00719703
Perlucidibaca	0.00193642	0.000419558	0	0.0145232	0	0.00135549	0	0.00142004	0.000387284	0.000129095
Zavarzinia	0	0	0	0	0	0.0143295	0	0	0	0
Lysinibacillus	0	0	0	0	0	0	0.0141359	9.6821e-05	0	0
Methanoregula	0.00832661	0.0135872	0.000322737	6.45474e-05	0.000258189	0	0.0116508	0	0.000258189	0.000161368
Sedimentibacter	0	0	0	0	0	0.000161368	0.0132645	0	0	0
Candidatus_Methanoperedens	0.0131031	6.45474e-05	0	0.00254962	0	0	0	0	0	0.000129095
Methylomonas	0.000258189	0.0130386	0.00929482	0.000419558	3.22737e-05	0	0.000903663	3.22737e-05	0.000225916	0
Anaerolinea	0.00374375	0.00558335	0.00151686	0.00542198	0.0126836	0	0.003066	0.00287236	0.00200097	0.000742295
Clostridium_sensu_stricto_12	9.6821e-05	0	0.000129095	0	0	0	0.012619	0	0.000129095	0
Geothermobacter	0.00177505	0.00390512	0.0125867	0.0047765	0.00342101	0.00406648	0.00193642	0.00448604	0.00242053	0.00406648
mle1-7	0.000129095	0.00142004	0.00100048	0.000258189	0.00203324	0.0121995	9.6821e-05	0.00558335	0.00706794	0.0053897
Candidatus_Nitrotoga	0.0116508	0.00103276	0.000451832	0.00180733	0.000290463	0.000193642	0	0.000710021	0.000677747	0.00384057
Ruminiclostridium	0.000258189	0.000193642	0.000484105	0	0.000161368	0.00209779	0.0114572	3.22737e-05	0.000322737	9.6821e-05
ADurb.Bin063-1	0.00238825	0.00668065	0.00597063	0.00300145	0.00648701	0.000290463	0.00648701	0.0113926	0.010263	0.00380829
Dongia	9.6821e-05	0.00167823	0.000742295	0.000451832	0.00254962	0.0112312	0.000677747	0.00390512	0.0049056	0.00387284
Hydrocarboniphaga	0	0	0	0.0108117	0	0	0	0	0	0
Fluviicola	0.000484105	0.00319509	0.000258189	0.0107149	0.000839116	0	0.000387284	9.6821e-05	0.000935937	0.000258189
Panacagrimonas	0	0	0	0.0103921	0	0.00264644	0	0.000451832	0.00171051	0.00593836
Paludibaculum	0.00664838	0.00380829	0.0035501	0.00322737	0.00493787	0.00697112	0.000806842	0.0100048	0.00467968	0.00545425
Candidatus_Nitrosotenuis	0	0.000129095	0.000225916	0.000580926	0.000516379	0.0098112	0	0.00371147	0.00161368	0.00277554
Desulfatiglans	0.00225916	0.00193642	0.00561562	0.00096821	0.00232371	0.000129095	0.00325964	0.00977893	0.00497015	0.00855253
Algoriphagus	0.00964983	0	0.000774568	0	0.00206552	0.000193642	0	0.000580926	0.000258189	9.6821e-05
Vogesella	0.000451832	0.00035501	0.000193642	9.6821e-05	0.00035501	0	0.000322737	0	0.00952074	0.000839116
BSV13	0.00861707	0.00203324	0.000419558	0.000161368	0.000580926	0.000677747	0.00726158	0.000677747	0.000258189	0.000322737
Halomonas	0.00810069	0.00826206	0.000645474	0.00158141	0.00154914	0	0.00103276	0.000935937	0.000322737	0.000161368
Aquabacterium	0.00203324	0.00364693	0.00238825	0.00816524	0.00151686	0.00142004	0.00342101	0.000516379	0.00332419	0.00154914
Acinetobacter	0.00161368	0.000225916	0.000839116	0.00119413	0.00145232	0	0.00813297	0.000129095	0.00393739	6.45474e-05
BD1-7_clade	0.00148459	0.00810069	0.00287236	0.00345328	0.00442149	0.00180733	0.00096821	0.00526061	0.00264644	0.00303373
Cavicella	0.00806842	0.00238825	0.00106503	0.00403421	0.000548653	0.000161368	0.000225916	0.000225916	0.000193642	0.000258189
Sulfurisoma	0.00519606	0.00739067	0.00342101	0.00803615	0.00419558	0	0.00319509	0.00100048	0.00119413	0.0006132
Haliangium	0.000451832	0.00232371	0.0012264	0.00135549	0.00793933	0.00451832	0	0.00342101	0.00313055	0.0079716
Spirochaeta	0.00771341	0.00267872	0.00203324	0.000903663	0.00100048	9.6821e-05	0.000806842	0.00193642	0.00229143	0.00258189
Methylotenera	0.00142004	0.00103276	0.00739067	0.000419558	0	0.000161368	0.00035501	0	6.45474e-05	0.000129095
Geobacter	0.0073584	0.00616427	0.00348556	0.00209779	0.00196869	0.00238825	0.0042924	0.0006132	0.00467968	0.00213006
Thauera	0	0.000225916	0.000580926	0.000451832	0.00238825	0.00261417	0.000516379	0.00196869	0.00713248	0.00296918
Sh765B-TzT-35	0.000742295	0.00187187	0.00154914	0.00132322	0.00203324	0.00180733	0.000322737	0.00519606	0.00284008	0.00710021
Acetobacteroides	0.00106503	0.00035501	0.00316282	0	0.000322737	0	0.00700339	0	0.000935937	0
Dinghuibacter	0.00693884	0.00119413	0.000742295	9.6821e-05	0.000451832	0.000258189	0.000548653	0.00100048	0.000677747	0.000193642
Malikia	0	0	0.00035501	0	0.000193642	0	0.00480878	0	0.00668065	0
Bryobacter	0.000548653	0.0012264	0.000806842	0.000871389	0.00287236	0.00668065	0.000161368	0.00213006	0.00225916	0.00222688
unidentified_Hydrogenophilaceae	0.00151686	0.00597063	0.00658383	0.00151686	0.00568017	0	0.00103276	0.000516379	0.00119413	0.000484105
Acidaminobacter	0	0.000516379	0.00651928	0.000161368	0.000871389	0.00264644	0.00287236	0.000322737	0.00106503	0
Desulfobulbus	0.00196869	0.003066	0.00642246	0.000903663	0.00254962	0.000516379	0.00493787	0.00225916	0.000451832	0.000451832
pLW-20	0	0.00206552	0.00639019	0	0.000193642	0	0	0	0	0
Pseudarcobacter	0	0	0.000677747	0	0	0.000935937	0.00629337	0	3.22737e-05	0
Sulfurifustis	0.0018396	0.00277554	0.0018396	0.00180733	0.00277554	0.000677747	0.000484105	0.00622882	0.006132	0.00229143
Sva0081_sediment_group	0.000774568	0.00277554	0.00622882	0.0018396	0.00406648	0.000484105	0.00235598	0.00545425	0.00461514	0.00296918
GOUTA6	0	9.6821e-05	9.6821e-05	0.000129095	9.6821e-05	0.00109731	0.000258189	0.00325964	0.00235598	0.00603518
Syntrophorhabdus	0.00125867	0.00590608	0.00371147	0.000322737	0.000839116	0	0.00209779	0.00225916	0.00119413	0.00132322
MM2	0.00590608	0.00216234	0.000193642	0	9.6821e-05	0	0.000742295	0	0	0.000193642
Terrimonas	9.6821e-05	0.000322737	0.000710021	0.00590608	0.00242053	0.00267872	0.000225916	0.00358238	0.00158141	0.000290463
Piscinibacter	0.000710021	0.00216234	0.000451832	0.00164596	0.00332419	0.00258189	0.000677747	0.00229143	0.00577699	0.00206552
Sulfurovum	0	0	0.00577699	0	0.00309827	0	6.45474e-05	6.45474e-05	0	0
Actibacter	0.00577699	0.00164596	0.000193642	0.000774568	0.000193642	0	0.000677747	0	0	3.22737e-05
Novosphingobium	0.00103276	0.0006132	0.000548653	0.00574472	0.00568017	0.00145232	0.000742295	0.00138777	0.00190415	0.000806842
Denitratisoma	0.000387284	0.00180733	0.000290463	0.00542198	0.00564789	0	0.000516379	0.00164596	0.000322737	0.000516379
Azospira	0.000322737	0.000742295	0.00035501	0.000548653	0	0.00561562	0.00213006	0	0.00106503	0.00035501
Chryseolinea	0	0.000484105	0.000451832	9.6821e-05	0.00329192	0.0055188	0	0.00300145	0.00216234	0.00322737
Azovibrio	0	0	0.00277554	0	0	0.00164596	0.00529288	0	0.000419558	0
OM27_clade	6.45474e-05	0.00174278	0.000774568	0.000677747	0.000484105	0.00171051	9.6821e-05	0.00103276	0.00516379	0.00109731
Ferritrophicum	0.00216234	0.00225916	0.00503469	0.000742295	0.00371147	0	0.00096821	0.00145232	0.0012264	0.000129095
Zoogloea	0.000419558	0.000129095	0.000580926	0.000161368	0.00035501	0.0049056	0.00203324	0	0.00219461	9.6821e-05
XBB1006	0	0	0	0	0	0	0.00487333	0	0	0
Roseimarinus	0	0.000322737	0.00203324	9.6821e-05	0.00484105	0.000451832	0.000516379	0.000419558	9.6821e-05	0
OLB12	0.0047765	0.00106503	0.00177505	0.00193642	0.00235598	0.000225916	0.000193642	0.00325964	0.000871389	0.000742295
Bdellovibrio	0.000871389	0.00474423	0.00161368	0.00364693	0.00119413	0.000193642	0.000322737	0.00154914	0.00377602	0.00254962
Syntrophomonas	0.000387284	0.000484105	0.000258189	0	0	9.6821e-05	0.00451832	0	0	0
Fonticella	0	0	3.22737e-05	0	0	0	0.00438922	0	0	0
Prevotella_9	0	0	0	0	0	0	0.00422785	0	0	0
WCHB1-32	0.000935937	0.000322737	0.0018396	0.0006132	0.00225916	0.00232371	0.00422785	0.000225916	0	0.000193642
Sulfuritalea	0.000290463	0.0041633	0.00274326	0.00342101	0.00300145	0	0.000290463	0.00096821	0.00348556	0.00206552
Fusibacter	0	0	0.000710021	9.6821e-05	0.000935937	0.00409876	0.0006132	0.000129095	0.000225916	0
[Desulfobacterium]_catecholicum_group	0	0.000129095	0.000161368	0.00035501	0.00406648	0	0.000225916	0.000322737	0	0
Gaiella	0	0.000419558	0.000193642	0.000129095	0.000580926	0.00400194	0	0.00222688	0.00313055	0.000774568
Syntrophus	0.00396966	0.00235598	0.00254962	0.000839116	9.6821e-05	0	0.000871389	0.00196869	0.00135549	0.000839116
Ignavibacterium	0.00161368	0.000871389	0.00390512	0.00125867	0.00229143	0.000839116	0.000548653	0.00396966	0.000903663	0.00161368
Crenothrix	0.000580926	0.00390512	0.000935937	9.6821e-05	0.000645474	0	0.00106503	0.000774568	0	0
Treponema	0.000129095	0.00112958	0.000290463	0.000225916	0.00377602	0.000839116	0.00384057	0.000225916	0.000129095	0
Desulfobacca	0.000677747	0.0006132	0.00303373	0.000484105	0.00106503	0	0.00135549	0.00164596	0.00377602	0.00200097
unidentified_SCGC_AAA011-D5	0.000645474	0.000484105	0.000645474	0.000322737	0.000580926	0.000161368	0.000387284	0.000129095	0.0029369	0.00377602
Anaeromyxobacter	0.00361465	0.00251735	0.0012264	0.000839116	0.00193642	0.00277554	0.000548653	0.00261417	0.00284008	0.00303373
Pedobacter	0.00361465	0	0	3.22737e-05	9.6821e-05	0	0	0	9.6821e-05	0
Desulfoprunum	0.000742295	0	0.00177505	0.000322737	0.00358238	0	0.000451832	0.000290463	0	0
DEV008	0.000193642	0.000161368	0.00135549	0.000322737	0.00348556	0.000742295	0	0.00248507	0.000451832	0.000290463
Alterococcus	0	0.000193642	0.000129095	0.000290463	0.00335646	0.000677747	0.000225916	0.00261417	0.000806842	0.00035501
Candidatus_Solibacter	0.00242053	0.00106503	0.00222688	0.000484105	0.000935937	0.003066	0.000290463	0.00284008	0.00329192	0.00158141
Formivibrio	0	0	0.000806842	0	0.0006132	0.000129095	0.00319509	3.22737e-05	0.000225916	0.000451832
unidentified_Cyclobacteriaceae	0.00316282	0	0	0	0	0	0	0	0	0
Hirschia	0	0.000387284	0	0.000193642	0.00158141	0.00177505	0.000161368	0.00313055	0.000580926	0.000935937
Smithella	0.00145232	0.003066	0.00116185	0.00096821	0.000451832	0	0.00274326	0.000290463	0	0.000322737
Acidibacter	0	0	3.22737e-05	0	0.00203324	0.003066	9.6821e-05	0.000548653	0.00138777	0.000387284
Woeseia	0	0	0.000290463	0	0.000225916	0.00303373	0	0.000451832	0.00135549	0.000806842
unidentified_MBNT15	6.45474e-05	0.000225916	0.00103276	0.00129095	0.00119413	0.00129095	0.00035501	0.00300145	0.000548653	0.00303373
unidentified_Thermodesulfovibrionia	0.000516379	0.000645474	0.00106503	0.000193642	0.000677747	0	0.000580926	0.00300145	0	9.6821e-05
Propionivibrio	0.000484105	0.00112958	0.00171051	0	0.000645474	0.000871389	0.00109731	0.00296918	0.00119413	0.0006132
SWB02	3.22737e-05	0.000451832	0.000387284	0.0006132	0.00238825	0.00280781	0	0.0029369	0.00103276	0.00154914
Clostridium_sensu_stricto_1	0	0	3.22737e-05	0	0	0	0.00284008	0	0.000419558	0.000161368
Z-35	0	0	0	0	0	0	0.00284008	0	0.000258189	0
Dechlorobacter	0	0.000322737	0.000258189	0	0	0.00284008	0.00106503	0	0.000258189	0
Lacunisphaera	0.000322737	9.6821e-05	6.45474e-05	3.22737e-05	0.00280781	0.00109731	0.00116185	0.00222688	0.00116185	0.000580926
unidentified_Anaerolineaceae	0.00203324	0.00148459	0.000225916	0.00261417	0.00264644	0	0.000742295	6.45474e-05	6.45474e-05	6.45474e-05
Leptolinea	0.000710021	0.00167823	0.000516379	0.00164596	0.00264644	0	0.00203324	0	0	0
Luteolibacter	0.000161368	0.00258189	0	0.00096821	0.00203324	0.000774568	0.00142004	0.000774568	0.00096821	0.0006132
Sandaracinus	0	0.00035501	0	0.00254962	3.22737e-05	0.000387284	3.22737e-05	0.0006132	0.000322737	0.000419558
Inhella	9.6821e-05	0.000484105	0	0.00129095	0.000290463	0	0	0.000161368	0.00254962	0.000290463
Fibrobacter	0	0	0	0	0	0	0.00251735	6.45474e-05	6.45474e-05	0.000387284
Ahniella	0.000419558	0.000871389	0.000225916	0.00180733	0.00145232	0.00251735	0	0.000742295	0.00116185	0.0006132
Magnetococcus	0	0	0	0	0.000225916	6.45474e-05	0	0.00248507	9.6821e-05	6.45474e-05
Methylomicrobium	0	0.00248507	0.000806842	9.6821e-05	0	0.00035501	0	0.00145232	0.000387284	0.000548653
unidentified_Actinomarinales	0	0	0.000129095	0	0	0.0024528	0	0.000742295	0.000290463	0.000451832
Anaerovorax	0	0.000451832	0.000193642	0	0	0.000871389	0.00238825	0	0	0
Sulfurospirillum	0	0	0	0	0	0	0.00238825	0	0.000225916	0
Hypnocyclicus	6.45474e-05	6.45474e-05	0.00235598	0	9.6821e-05	0.00200097	0.00219461	0	0.000322737	0.000129095
Sporobacter	0	0	0.000290463	0	0.000290463	0	0.00232371	0	0	0
[Eubacterium]_brachy_group	0.000193642	0.00232371	0.000225916	0.00100048	9.6821e-05	0.000225916	0.00116185	0	0	0
Subgroup_23	3.22737e-05	0.000322737	0.000710021	0	0.000516379	0	9.6821e-05	0.000935937	0.000935937	0.00232371
unidentified_TRA3-20	0	0.000290463	0.000645474	0	0.000839116	0.00109731	9.6821e-05	0.00229143	0.00119413	0.00148459
unidentified_BSV26	0.000193642	0.000580926	0.000387284	0.00138777	0.000742295	0.00035501	0.00035501	0.00190415	0.00229143	0.000935937
oc32	0.000774568	0.000387284	0.00164596	0.00225916	0.000548653	0.000258189	9.6821e-05	0.000129095	0.00119413	0.000387284
Azonexus	0	0	0.00109731	0	0	0.00222688	0	0	0	0
Christensenellaceae_R-7_group	0.000129095	0.000580926	0.000742295	0.000516379	0.00219461	0.000516379	0.00174278	0	0	6.45474e-05
Stenotrophobacter	0	0.000161368	0.000225916	0	0.00116185	0.00216234	0	0.00100048	0	0.000322737
Candidatus_Xiphinematobacter	0	0	0	0	0.000193642	0.00216234	6.45474e-05	0.00035501	0.00145232	3.22737e-05
unidentified_Vicinamibacterales	0	0	3.22737e-05	0	0.000484105	0.00216234	0	0.00116185	0.000484105	0.0006132
Sphingomonas	0	0.000484105	0.000451832	0	0.00158141	0.00209779	3.22737e-05	0.000677747	0.000806842	0.000806842
Tolumonas	0	0	0.00206552	0	0.000129095	0	0.000580926	0	0.000258189	0
Lautropia	0.000742295	0.00190415	0.00200097	0.00193642	0.00135549	0	0.000161368	0.000839116	0.000742295	0.000580926
Sideroxydans	0.000871389	0	0.00138777	0	0.00145232	0.000419558	0.00109731	0.00196869	0.00167823	0.000871389
Deferrisoma	0.000903663	0.000677747	0.00148459	0.00174278	0.000516379	0.000839116	0.00096821	0.000419558	0.00196869	0.00174278
Syntrophobacter	0.000677747	0.00193642	0.0012264	0	0.00112958	0.000225916	0.00109731	0.000742295	0.00142004	0.00193642
OM60(NOR5)_clade	0.000258189	0.000839116	0.000548653	0.00035501	0.00112958	0.000419558	0.000161368	0.00193642	0.000742295	0.000322737
Flavobacterium	0.000548653	0.000451832	0.000387284	9.6821e-05	0.000839116	0.00135549	0.000193642	0.000419558	0.00193642	0.00158141
Erysipelothrix	0.00035501	0.000645474	0.000129095	0.00109731	0.000516379	0.00190415	0.00174278	0	0	0
Ramlibacter	0	0	0.000225916	0	0.000322737	0.00190415	0	0	0.000935937	0.00035501
Gemmatimonas	0	0	3.22737e-05	0	0.000871389	0.00190415	0	0.0006132	0.000387284	0.000419558
Pseudoxanthomonas	0	0.000258189	0.00035501	0	0.00187187	0.000225916	0	0.000161368	0	0
Williamwhitmania	0	0	0	0	0	0	0.0018396	0	0	0
unidentified_Comamonadaceae	0	0	0	0.000903663	0.0018396	0	0	0	0.00158141	0.000806842
Lachnoclostridium	0	0	0	0	0.000129095	0	0.00180733	0	0	0
Magnetospirillum	3.22737e-05	0	0.000548653	0	0.000193642	0.00180733	0.000419558	6.45474e-05	0.000161368	0
GWE2-42-42	0.000387284	0.000419558	0.00035501	0	0	0	0.00180733	0	0	0
Candidatus_Methanofastidiosum	0.00177505	0.000387284	9.6821e-05	0.000129095	0	0	0.000451832	0	0	0
Rhodobacter	0	3.22737e-05	0.000516379	0.00129095	0.00177505	0.000677747	0.000580926	0.000451832	0.00035501	0
Lutispora	0	0	0	0	0.000129095	0.00119413	0.00177505	0	0.000129095	0
Methanomethylovorans	0.000258189	0.000193642	0	0	0.000193642	0	0.00174278	3.22737e-05	0	0
Clostridium_sensu_stricto_8	0	0	0.000387284	0	0.000322737	0	0.00174278	0	0	0
wb1-A12	0	9.6821e-05	0.000258189	0.00154914	0	0	0	0	6.45474e-05	0.00174278
unidentified_Oxalobacteraceae	0.00174278	0	0	0.000129095	0	0	0.000484105	0	0	9.6821e-05
BBMC-4	0	0.000645474	0.000484105	6.45474e-05	0.00174278	6.45474e-05	3.22737e-05	0.000419558	0.000161368	3.22737e-05
Ohtaekwangia	0.000161368	0	0	0	0.00174278	0.000290463	0	0	0	0.000322737
Desulfobacter	0	0	9.6821e-05	0	0.00171051	0	0	0	0	0
Macellibacteroides	3.22737e-05	0	0	0	0.000193642	0	0.00171051	0	0.000129095	0
Hyphomicrobium	0	0.000806842	0.00035501	0.00035501	0.00171051	0.000935937	0.000387284	0.000548653	0.000645474	0.000290463
Thermoanaerobaculum	0.000161368	0.000484105	0.000806842	0.000484105	0.000742295	0	0.000129095	0.00171051	0.000742295	0.00103276
Propionispira	0	0	0	0	0	0	0.00164596	0	0	0
Bauldia	0	0.000258189	0.000161368	0.000129095	0.000774568	0.00161368	0	0.000871389	0.00112958	0.000580926
Thermomonas	0	0.00161368	0.000903663	0.000387284	0.00096821	0	0.00035501	0	0	0.000225916
[Cytophaga]_xylanolytica_group	0.000161368	0	0.00096821	0	0.00161368	0.000580926	0.000677747	0.00151686	0	0
unidentified_Gemmatimonadaceae	0.000258189	0.000451832	0.000258189	0.00096821	0.00158141	0.000580926	0.000193642	0.000871389	0.000322737	0.000451832
Giesbergeria	0	0	0.000935937	0	0.000742295	0.000193642	0.00158141	0	0.000742295	0
Methanobacterium	0.0012264	0.00142004	0.00035501	0.000129095	0	0	0.00154914	0	0.000161368	0.000742295
Azoarcus	0	0	0	0.000451832	0.000580926	0.000161368	0	0	0.00154914	9.6821e-05
Devosia	0	0	0	0	0.00154914	0.000225916	0	0	0.000225916	0.000258189
Arenimonas	0.000677747	0.000645474	0.000129095	0.000839116	0.000935937	0.00151686	0.000258189	0.00135549	0.00109731	0.000645474
Crocinitomix	0	0	0	0.00148459	0.000129095	0	0	0	0	0
unidentified_Firmicutes	0	0	0	0	0	0	0.00148459	9.6821e-05	0	0
unidentified_Bacteroidetes_BD2-2	0.000290463	0.00116185	0.0006132	0.00145232	0.000516379	0	0.00035501	0.000129095	0	0
Calorithrix	9.6821e-05	6.45474e-05	0	0	0	0.00145232	0	0.000871389	0.000129095	0.000290463
Desulfatitalea	0	0	0.00142004	0	0.00106503	9.6821e-05	0	0.00106503	9.6821e-05	9.6821e-05
Comamonas	0.000451832	0	0.000225916	0.000225916	0.00138777	0	0.000322737	0	0.000419558	0
unidentified_Lineage_IV	0.000193642	0.00035501	0.000516379	0	0	0.00138777	9.6821e-05	0.000225916	9.6821e-05	0
UTCFX1	0.000903663	0.000742295	0.00035501	0.00096821	0.00135549	0	0	0.000935937	0.000258189	0.000871389
Hassallia	0	0	0	0	0.00109731	0.00135549	0	0.00125867	0.000258189	0.000258189
Ralstonia	0.00135549	0.000225916	0	0	0	0	0	0	6.45474e-05	0
Sulfuricella	0.00135549	0.000516379	0	0	6.45474e-05	0	0.000387284	6.45474e-05	0.000258189	0
Streptomyces	0	0	0	0	0.00135549	0	0	0	0	0
Ilumatobacter	0	0.000322737	0	0.000129095	0.00132322	0.000516379	0.000161368	0.000677747	0.000193642	0.000258189
Methanocella	0.00132322	0	0	0	0	0	9.6821e-05	0	0	0
Lachnotalea	0	0	0.000290463	0	0	0.000129095	0.00132322	0	0	0
unidentified_Hungateiclostridiaceae	0.000290463	0.000516379	0.00132322	0.000516379	0.000387284	0.000129095	0.00132322	0.000387284	0	0
Brevinema	0.00132322	0.000161368	0.000161368	9.6821e-05	9.6821e-05	9.6821e-05	3.22737e-05	0	0	0
Clostridium_sensu_stricto_9	0	0	0.00132322	6.45474e-05	0	0	0	0	0	3.22737e-05
Rivibacter	0.000129095	0	0	0	0	0.00132322	0	0.0006132	0.00112958	0.000451832
Phaselicystis	0.00129095	0.00119413	0.00035501	0.000258189	0.00106503	0.00100048	6.45474e-05	0.00100048	0.000677747	0.00129095
Anaeromusa-Anaeroarcus	0	0	0.000451832	0	0	0	0.00129095	0	0	0
Haliscomenobacter	0	6.45474e-05	0.000129095	0.00129095	0.000290463	0	0	0	0	0
Gallionella	0.000806842	0	0.000645474	0.00129095	9.6821e-05	0	0	0	0	0.000742295
Phenylobacterium	0.000129095	0.0006132	0.000161368	0.000290463	0.000548653	0.000548653	0.000225916	0.000677747	0.000677747	0.00129095
Ferribacterium	0	0	0	0	0.00129095	0.000258189	0.000193642	0	0	0
Citrifermentans	0.000516379	0.00035501	0.000710021	0.000806842	0.00125867	0.000742295	0.000193642	0.000387284	0.0006132	0.000580926
Fluviicoccus	0.000258189	0.000516379	0.000742295	0.00125867	0.000774568	0	0.000419558	0	0.000290463	0.000193642
P3OB-42	0.00035501	0.000258189	0.000193642	0.000451832	0.00106503	0.00035501	0	0.000451832	0.000580926	0.0012264
Cyanobium_PCC-6307	0.000322737	0.0012264	0	0.000290463	0	0	0.000290463	0	0	0
Candidatus_Electronema	0	0.000258189	0.000935937	0	9.6821e-05	0	0	0.00106503	0.0012264	0.000225916
Clostridium_sensu_stricto_3	0	0	9.6821e-05	0	9.6821e-05	0	0.0012264	0	0	0
C39	0	0.000161368	0	0	0	0	0.0012264	0	6.45474e-05	0
JdFR-76	0	0	0.000258189	0	6.45474e-05	0.00119413	0	0.000935937	0.000484105	0.000419558
unidentified_Desulfobacterota	0	0	0.000161368	0.000161368	0.000258189	0.000839116	0	0.00112958	0.00106503	0.00119413
TPD-58	0	0.000677747	0.000806842	0.000548653	0.000742295	0	9.6821e-05	0.000258189	0.00119413	9.6821e-05
unidentified_Gracilibacteria	0	0.00119413	0.0006132	0.000871389	0.000935937	0	0	0	6.45474e-05	0
unidentified_Solimonadaceae	0	0.00119413	0.000129095	0.000225916	0	0.000677747	0	0.00106503	9.6821e-05	0
Candidatus_Competibacter	0.000225916	6.45474e-05	9.6821e-05	0.000225916	0.00116185	6.45474e-05	0.000225916	0.000290463	0	3.22737e-05
RBG-16-49-21	0.00116185	0.00116185	0.00100048	0.000677747	0.000548653	6.45474e-05	0.000742295	0	6.45474e-05	0
Methanolinea	0.000903663	0.00116185	9.6821e-05	0.000193642	0	0	0.000806842	0	0	0.000387284
Ideonella	0.000193642	0	0.000419558	0.00112958	0	0.000193642	0.000548653	0	0.000387284	0.000516379
Hydrogenispora	0.000129095	0.00035501	0.00112958	0.000225916	0.000290463	0	0.000161368	0.000839116	0.00035501	0
Blvii28_wastewater-sludge_group	0.000290463	0.00112958	0.000419558	0.0006132	0.00103276	0.000322737	0.000387284	0.000258189	0.000129095	0
Oikopleura	0	0.000161368	0	0.000903663	0.000903663	0.000580926	0	0.00112958	0.000451832	9.6821e-05
unidentified_GW2011_GWC1_47_15	0	0	9.6821e-05	0	9.6821e-05	0	3.22737e-05	0	0	0.00109731
Longilinea	0.000225916	0.00103276	0.00035501	0.000290463	0.00109731	0	0.000871389	0.000225916	6.45474e-05	6.45474e-05
Pajaroellobacter	0.000161368	0.00035501	0	3.22737e-05	0.000548653	0.000193642	0	0.000742295	0.000710021	0.00109731
unidentified_Caldilineaceae	0.000290463	9.6821e-05	0.000225916	0.000484105	0.000645474	0.00109731	0.000258189	0.000258189	0	0.000258189
Aurantisolimonas	0.00106503	0.000548653	0.000871389	6.45474e-05	0.0006132	0.000677747	9.6821e-05	0.000871389	0.000839116	0.000580926
unidentified_Candidatus_Jorgensenbacteria	0	9.6821e-05	0	0.00103276	0.000290463	0.000193642	0	0.000839116	0.000580926	0.00106503
Phaeodactylibacter	0	0.000290463	9.6821e-05	0.00106503	0.000290463	0.000290463	0	0.000419558	0	0.000129095
Dokdonella	0	0	0	0	0.00103276	0	0	0	0	0
966-1	0	0	6.45474e-05	0	0.000129095	0.00103276	0	0.000193642	0.000548653	0.000225916
Ellin516	0	0.000419558	0.000484105	0.000225916	0.000903663	0.000161368	0	0.00103276	0.000774568	0.000451832
Delftia	0.00103276	0.000161368	0	0	0	0	0	0	0	0
Pseudorhodoplanes	0	0	0	0.000322737	0.00103276	0.000225916	0	0.000387284	0.000516379	0
Flavihumibacter	0.00103276	0	0.000290463	3.22737e-05	0.000806842	9.6821e-05	0	0	0.000290463	0
Peptoclostridium	0	0	0	0	0	0	0.00100048	0	0	0
Amnipila	0	0	0	0	0	0	0.00100048	0	0	0
Steroidobacter	0	6.45474e-05	0	0	0.000161368	0.00100048	6.45474e-05	0.000677747	0.000710021	0.000387284
Candidatus_Accumulibacter	0.000580926	0.000548653	0.000258189	0.000225916	0.00100048	0	0.000484105	0.000225916	0.000161368	0
Methylosarcina	0	0.00100048	0	0	0	0.000322737	0	0	6.45474e-05	0.000322737
Sulfuriferula	0	0	0	0	0	0	0	0.000193642	0	0.00100048
Uliginosibacterium	0	6.45474e-05	0.000548653	0.000129095	0	0	0.00100048	9.6821e-05	0	0.000225916
HN-HF0106	0	0.000161368	0.000225916	0	0.000161368	0	0.00100048	0	0	0
unidentified_Subgroup_7	0.000161368	0.00100048	0.000419558	0.000258189	0.000451832	0	0.000225916	0.000742295	0.000129095	0.00035501
OLB13	0	0	0	0	0.00100048	0	0	0	0	0
unidentified_NS9_marine_group	0	0	0	0	0	0.00096821	0	0.000161368	0	0
Luteitalea	3.22737e-05	0.00035501	0.000225916	0.000225916	0.00096821	0.000225916	0	0.000484105	6.45474e-05	0.000258189
MM1	0	0.00096821	0	0	0	0	0	0	0.000419558	6.45474e-05
Pedomicrobium	0	0	0.000129095	0.000516379	0.000645474	0.00096821	0	0.000193642	0.000290463	0.000225916
Desulforhabdus	9.6821e-05	0.000484105	0.000580926	0	0.00096821	0	0.000484105	0.000258189	0.000290463	0.000290463
Sulfurimonas	0.00096821	0	0	0	0	0	3.22737e-05	0	0	0
Anaerocella	6.45474e-05	0	0	0	0	0	0.000935937	0	0.000129095	0
Chitinivorax	0.000548653	0.000580926	0.000710021	0.000935937	0.000193642	0.000161368	0.00035501	0.000193642	0.000193642	0.000193642
Methanospirillum	6.45474e-05	0.000871389	0.000193642	0	0.000258189	0	0.000935937	0	9.6821e-05	0
unidentified_SBR1031	0.000935937	0.000419558	0.000258189	0.000258189	0.000516379	0	0.000322737	9.6821e-05	0	0.000193642
Plasticicumulans	0	0.000129095	3.22737e-05	0	0	0.000193642	0	0.000161368	0.000935937	0.000161368
unidentified_Campylobacterales	0	0	0.000935937	0	0.000580926	0	0	0	0	0
Permianibacter	0	0	6.45474e-05	0.000419558	0.000322737	0.000903663	0	6.45474e-05	3.22737e-05	3.22737e-05
Holophaga	0.000193642	0.000451832	0.000258189	0.000322737	0.00035501	0.000903663	0.00035501	0	0.000161368	0
Endomicrobium	0.00035501	0.000645474	0.000580926	0.000710021	0.000903663	3.22737e-05	0.000161368	0.000161368	0	6.45474e-05
Ketobacter	0	0.000161368	0.000225916	9.6821e-05	0.00035501	9.6821e-05	0	0.000419558	0	0.000871389
Levilinea	0.000161368	0.000225916	0	0.000161368	0.000871389	0	0.000290463	0.000161368	0.000258189	0.000129095
Leptospirillum	0	0	3.22737e-05	0	0	0.000871389	0	0.000742295	0.000225916	0.000129095
Cloacibacterium	0	0	9.6821e-05	0	0	0	0.000839116	0	0.000258189	0
Trichlorobacter	0	0	0.0006132	0	0.000839116	0	0.000484105	0	0	0
NK4A214_group	0	0	0	0	0	0	0.000839116	0	0	0
Roseomonas	9.6821e-05	0.000839116	0.000548653	0.000290463	0.0006132	0.000419558	9.6821e-05	0.00035501	0.000516379	0.000322737
Aeromonas	0.000129095	0	0	0.000161368	0.000161368	0	0.000839116	0	0	9.6821e-05
Bacillus	0.000225916	0	0	0	0.000839116	0.000225916	0	0.000161368	0.000387284	0
Desulfomonile	0	0.000129095	0.0006132	6.45474e-05	0.000548653	0	0	0.000387284	0.000806842	0.00035501
DSSD61	0	0.000225916	6.45474e-05	0	0.000806842	0.000806842	0	0.000548653	0.000451832	0.000225916
CL500-29_marine_group	6.45474e-05	0	9.6821e-05	0.000516379	0.000806842	0.000419558	0	0.00035501	9.6821e-05	0.000419558
Reyranella	0	0	0.000225916	0	0.000258189	0.000806842	0	0.000516379	0.000193642	0.000225916
unidentified_Candidatus_Nomurabacteria	0	0	0	0	0.000806842	0	0	0	0	0
ADurb.Bin118	3.22737e-05	0.000322737	0	6.45474e-05	0.000806842	0.000129095	3.22737e-05	0.000710021	0.000710021	0.000193642
Methylobacter	0	0	0	0	0	0.000806842	0	0	0.0006132	0.000710021
Trichloromonas	0	0	0.000806842	0	0	0	0	0	0	0
Geothrix	0.000193642	0	0	0	0.000161368	0	0	0.000129095	0.000516379	0.000806842
Desulfuromonas	0	0	0	0.000774568	0.000322737	6.45474e-05	0.000193642	0	0	0
Candidatus_Omnitrophus	0	0	0.000193642	3.22737e-05	0.000161368	0	0.000225916	0.000774568	9.6821e-05	0.000258189
Lysobacter	0.000677747	0.000645474	6.45474e-05	0	0.000774568	0.000548653	0	0.000290463	0.000225916	0.000129095
Desulfovirga	0.000516379	0.000290463	0.000258189	0.000193642	0.000774568	0	0.000516379	0.000387284	0.000742295	9.6821e-05
Desulfatirhabdium	0.000193642	0.000193642	0.0006132	0.000387284	0.000774568	0	0	0	0	0
Nocardioides	0	0	9.6821e-05	0.000322737	0.000774568	0.000225916	0	0.000322737	0.000451832	0.000161368
Fervidicella	0.000129095	0	0.000742295	0	0	0	0.000548653	0	0	0
unidentified_mle1-27	0.000742295	0.000451832	0	0.000516379	0	0	0	0	0.000387284	9.6821e-05
Cellvibrio	0	0	0.000129095	0	0.000516379	0.000742295	0	9.6821e-05	0	0
Sulfuritortus	0.000742295	0	0	0	0	0	0	0	0	3.22737e-05
Chthoniobacter	0	0	0	0	0.000742295	0.0006132	0	0.000161368	0.000580926	0.000225916
Altererythrobacter	0	0	0.000322737	0	0.000387284	0.000677747	0	0.000742295	0	0.000322737
unidentified_SC-I-84	9.6821e-05	0	0	0	0	0.000677747	0	0.000387284	0.000742295	0
unidentified_Elev-16S-1166	0	0	0	0	0.000710021	9.6821e-05	0	0	0	0
Simplicispira	0.000451832	0.000710021	0	0.000322737	0.000387284	0	0.000258189	0	0	0
unidentified_Saprospiraceae	0	0	0.000710021	0	0.000645474	0.000193642	6.45474e-05	9.6821e-05	0.000161368	0.000322737
unidentified_Rhodocyclaceae	0	0.000677747	0.000387284	0	0.000710021	0	0	0	0.000451832	0
Sumerlaea	0	0.000290463	0	3.22737e-05	0.000516379	0.000710021	3.22737e-05	0.000484105	0.000225916	0.000419558
RBG-16-58-14	0.000322737	0	0.000710021	0.000258189	0.000580926	0	0.0006132	0	0	0.000129095
[Agitococcus]_lubricus_group	0	0.000129095	0.000193642	0.000387284	0	9.6821e-05	0	0.000258189	0.000677747	0
Bradyrhizobium	0	0.000193642	9.6821e-05	0	0.000290463	0.000451832	0	0.000484105	0.000677747	0.000290463
Azotobacter	0	0	0	0	0	0.000516379	0	0	0.000677747	0
Ercella	0.000193642	0.000645474	0.000580926	0	0	0	0.000677747	0	0.000258189	0
Opitutus	0	0.000193642	0	0.000258189	0.000677747	0.000387284	0	0.000419558	0.000645474	6.45474e-05
Rubrivivax	0	0	0.000677747	0	0.000225916	0	0	0	0	0
Acidovorax	0	0.000387284	0.000225916	0	0.000193642	0.000387284	0.000161368	0	0.000677747	0
Methyloversatilis	0.000290463	3.22737e-05	0	0.000484105	0.000645474	0	0.000193642	0	0	6.45474e-05
Defluviicoccus	0	0	0	0	0	0.000645474	6.45474e-05	0	0.000451832	0
Micromonospora	0	0	0	0	9.6821e-05	0.000645474	0	0.000129095	0	0
Peredibacter	0.000290463	9.6821e-05	6.45474e-05	0.000645474	3.22737e-05	0	0.000387284	3.22737e-05	0	3.22737e-05
Lentimicrobium	0.000548653	0.000290463	0.000290463	0.000645474	0.000193642	0	0.000258189	0.000161368	0	0
unidentified_Sandaracinaceae	0	9.6821e-05	0	0	0.000193642	0	0	0.000580926	0	0.0006132
Niveispirillum	0	0	0	0.000129095	0	0	0	0	0.0006132	3.22737e-05
Desulfococcus	9.6821e-05	0	0.000225916	0.000225916	0.0006132	0	9.6821e-05	0	0	0
Nannocystis	0	0	3.22737e-05	3.22737e-05	0.0006132	0	0	0.000258189	3.22737e-05	0.000129095
Sporomusa	0	0	0	0	0	0	0.0006132	0	0	3.22737e-05
Solimonas	9.6821e-05	0.0006132	0	0	0	0	0	0	9.6821e-05	0
Paracoccus	0	0	0	0.000193642	0.000580926	0	0	0	0	0
Skermanella	0	0	0	0	0.000580926	0.000225916	0	0.000129095	9.6821e-05	0
IS-44	0	9.6821e-05	0	0.000193642	3.22737e-05	0.000580926	0	0	0.000387284	0.000516379
Anaerosporobacter	0	0	0	0	0	0	0.000580926	0	0	0
Pseudolabrys	0	0	0	0	0.000580926	0	0	0	0	0.000258189
Bacteriovorax	0.000161368	0.000419558	0.000193642	0	0	0.000193642	0.000225916	0	0.000580926	3.22737e-05
Achromobacter	0.000322737	0	3.22737e-05	0.000161368	0.000580926	0	9.6821e-05	9.6821e-05	0.000129095	3.22737e-05
Aeromicrobium	0	0	0	0	0	0.000580926	0	0.000580926	0	0.000322737
Desulfomicrobium	0	0.000193642	0.000322737	0.000322737	0.000580926	0.000225916	0.000129095	9.6821e-05	0	0.000225916
Desulfurivibrio	0.000129095	0	0.000387284	0.000580926	0	0.000161368	9.6821e-05	0	0	0
Microbacterium	0	0	0	0	0.000580926	0.000129095	0	0	0	0
Caulobacter	0	0	0	0.000387284	0.000548653	9.6821e-05	0	0.000290463	0.000225916	0.000290463
Mesorhizobium	0	0	0	0	0	0.000548653	0	0	0	0
Variovorax	0	0	0	0	0	0.000548653	0	0	0	0
Sphingobium	0	0	0	0	0.000548653	0	0	0	0	0
Azospirillum	0	3.22737e-05	0.000161368	0	6.45474e-05	0	9.6821e-05	0	0.000548653	3.22737e-05
SM1A02	0	9.6821e-05	0	0	0.000129095	6.45474e-05	0	0.000548653	0.000161368	3.22737e-05
Polyangium	0	0.000548653	0	0.000129095	0	0	0	0.000258189	0	0.000258189
SH3-11	0	0	0	0	0.000516379	0	6.45474e-05	0.000193642	0	9.6821e-05
Desulfovibrio	0	0.000387284	0.000225916	6.45474e-05	0.000516379	0	0	0.000193642	0.000193642	0.000225916
Candidatus_Alysiosphaera	0	9.6821e-05	6.45474e-05	0	0.000387284	0.000516379	0	0.000161368	0.000258189	9.6821e-05
Ferruginibacter	3.22737e-05	9.6821e-05	0	0.000516379	0.000193642	0	0	0	0.000225916	0
unidentified_MB-A2-108	0	0	0	0.000258189	0	0.000161368	0	0.000290463	0.00035501	0.000516379
unidentified_Xanthobacteraceae	0	0	0	0	0.000516379	0.000290463	0	0.000322737	0	0
Methanomassiliicoccus	0	6.45474e-05	0	6.45474e-05	0	0.000193642	0.000516379	0	0	0
GWD2-49-16	0.000129095	0.000129095	0.000129095	0	9.6821e-05	0	0	0.000484105	0	0
Oxobacter	0	0	0	0	0	0.000484105	0.000225916	0	0	0
unidentified_Microtrichales	0	0.00035501	0	0	0	0.000484105	0	0	0.000322737	0
Agromyces	0	0	0	0	0	0.000484105	0	0	0	0.000129095
Brevifollis	0	0	0	0.000484105	0	0	0	6.45474e-05	0.000258189	0
Pseudonocardia	0	0	0	0	0	0.000484105	0	0	0.000161368	0
unidentified_SR-FBR-L83	0.000161368	0.000161368	0	6.45474e-05	0.000484105	0	0	0.000387284	0	3.22737e-05
[Polyangium]_brachysporum_group	0	0	0	0	0	0.000484105	0	0	0	0
unidentified_Steroidobacteraceae	0	0.000225916	0	0	0	9.6821e-05	0	0.000290463	0.000484105	0
unidentified_Sphingomonadaceae	0	0	6.45474e-05	0.000484105	0	0.000193642	0	0	0	0
Nakamurella	0	0	0	0	0	0.000484105	0	0	6.45474e-05	0
Iamia	0	0.000129095	0	0	0.000322737	0.000451832	0	0.000193642	0.000161368	3.22737e-05
unidentified_Prolixibacteraceae	3.22737e-05	9.6821e-05	6.45474e-05	0.000451832	0	0	0	0	0	0
Demequina	0	0	0	6.45474e-05	0.000451832	0	0	0	0	0
Colidextribacter	0	0	0	0	0	0	0.000451832	0	0	0
Clostridium_sensu_stricto_7	0	0	0	0	0	0	0.000451832	0	0	0
Cephaloticoccus	9.6821e-05	0.000290463	0	0.00035501	0.000451832	0	0	0	0	0
Azohydromonas	0	0	0	0	0	0.000451832	0	0	0	0
unidentified_Syntrophobacterales	0	0	0	0	0.000129095	0	0	0.000419558	0.000387284	0.000451832
unidentified_Spirochaetaceae	0	6.45474e-05	0.000258189	0.000129095	0.000451832	0	0.000322737	0.000161368	0	0
Gemmobacter	0	0	0	0	0.000451832	0	0	0.000129095	0	0
unidentified_SJA-28	0	0	0	0	0.000451832	0	0	0	0	0
Stenotrophomonas	0.000451832	0.000161368	6.45474e-05	6.45474e-05	0.00035501	6.45474e-05	0	0.000129095	0	0
Porphyrobacter	0	0	0	0	0.000225916	0.000419558	0	0	0.000258189	0
Erythrobacter	0	0	0	0	0.000419558	0	0	0	0	0
unidentified_Zixibacteria	0.000258189	6.45474e-05	0	3.22737e-05	0.000419558	0	0	9.6821e-05	0.000258189	9.6821e-05
unidentified_Lachnospiraceae	0	0	0	0	0	0	0.000419558	0	0	0
Nordella	0	0	0	0	0	0	0	0.000419558	0.000225916	0
unidentified_SB-5	0	0	0.000322737	0	0.000419558	0	0	0	0	0
Candidatus_Tenderia	0	0	0	0.000161368	0	0	0.000419558	0.000387284	0	0.000419558
Coxiella	0.000419558	0.000290463	0.000290463	9.6821e-05	9.6821e-05	0	0	3.22737e-05	0.000225916	0.000129095
Bellilinea	0	9.6821e-05	0	9.6821e-05	0.000419558	0	0	9.6821e-05	9.6821e-05	0.000129095
Prosthecobacter	0	0	0	0.000419558	9.6821e-05	0	0	0	6.45474e-05	3.22737e-05
Amphiplicatus	0	9.6821e-05	0	0.000129095	0.000419558	0.000193642	0	0.000193642	0	9.6821e-05
unidentified_DTB120	0	0	0	0.000193642	0	0	0	0.000419558	0	0.000193642
AR15	9.6821e-05	0.000258189	6.45474e-05	0.000419558	0.000225916	9.6821e-05	0	0	0	0.000258189
Aliidiomarina	0.000419558	0	0	6.45474e-05	0	0	0	0	0	0
Magnetovibrio	0	0	0	0	0.000161368	0.000322737	6.45474e-05	0.000419558	3.22737e-05	6.45474e-05
Candidatus_Altiarchaeum	6.45474e-05	6.45474e-05	0	6.45474e-05	0	0	0	0	0	0.000387284
unidentified_Syntrophales	0	0.000387284	0	0	0	0	0	0	0	0
Candidatus_Entotheonella	0	0	0	0	0	0.000387284	0	6.45474e-05	0	0
Anaerobacterium	0	0	0	0	0	0.000387284	0	0	0	0
Mycobacterium	0.000129095	0.000193642	0	0.000193642	0	0.000258189	0	0.000129095	0.000387284	9.6821e-05
unidentified_Candidatus_Kaiserbacteria	0	0.000193642	0	0	0	0	6.45474e-05	0	0.000387284	0.000193642
unidentified_Fibrobacteraceae	0	0	0	0	0	0.000387284	0	0	0	6.45474e-05
JGI-0000079-D21	0	9.6821e-05	0	9.6821e-05	0	0	0.000387284	0	3.22737e-05	0
Bact-08	0	0	0	0	0	0	0.00035501	0	0	0
Methylobacterium-Methylorubrum	0.00035501	0	0	0	9.6821e-05	0	0	0	0	0
Lacibacter	0	0	6.45474e-05	0	0.00035501	0	0	9.6821e-05	0.000129095	9.6821e-05
Rhodoplanes	0	0	0	0.000161368	0	0.00035501	0	0	0.000290463	0.000161368
AKYG587	0	0	0	6.45474e-05	3.22737e-05	0.000161368	6.45474e-05	0.00035501	3.22737e-05	0
RB41	3.22737e-05	0.000161368	0.000225916	0.000322737	0	0.000322737	9.6821e-05	6.45474e-05	0.00035501	0.000225916
Candidatus_Iainarchaeum	0	0.000225916	3.22737e-05	0	0	3.22737e-05	0	0	0	0.00035501
HdN1	0	0.000161368	0	0.00035501	0	9.6821e-05	0	9.6821e-05	0.000129095	0.000193642
Rheinheimera	3.22737e-05	0	0	6.45474e-05	0.000290463	0.000161368	0	0	0.00035501	3.22737e-05
unidentified_Enterobacterales	0	0	0	0	0.000193642	0.00035501	0	0.000258189	3.22737e-05	0
Candidatus_Methylospira	0	0	0	0	0	0	0.000161368	0	0.00035501	0.000161368
Aquicella	0	0	0	0	0	3.22737e-05	0	0	0	0.000322737
Elioraea	0	0	0	0	0	0.000322737	0	0.000225916	9.6821e-05	0
Chitinilyticum	0	0	0	0	0	0	0	0.000322737	0	0
GWE2-31-10	0.000322737	0.000129095	9.6821e-05	0	0.000225916	0	0.000161368	3.22737e-05	0	0
Aridibacter	0	0	6.45474e-05	0	0.000322737	0	0	0	0	0
unidentified_SAR324_clade(Marine_group_B)	3.22737e-05	0	0	0.000161368	0.000322737	0.000193642	0	0.000225916	0.000161368	0.000322737
Archangium	0	0	0	0	0	0.000322737	0	0	0	0
Kaistia	0	0	0	0	0.000322737	0	0	0	0	6.45474e-05
IMCC26207	9.6821e-05	9.6821e-05	0	0.000322737	0.000290463	0	0	0	0	0
Ferrovibrio	0	0	0	0	0.000322737	0	0	6.45474e-05	0	6.45474e-05
unidentified_Chitinophagaceae	0.000322737	9.6821e-05	0	0	9.6821e-05	0	0	0	0	0
Rhizomicrobium	0	0	0	0	0	0	0.000322737	0	0	0
Brevundimonas	0	0	0	0	0.000322737	6.45474e-05	0	0	0	0
Limnobacter	6.45474e-05	0.000193642	0	0.000322737	9.6821e-05	0.000161368	0	0	6.45474e-05	3.22737e-05
Actinoplanes	0	0	0	0	0.000322737	0	0	0	0	0
Sterolibacterium	0	0	0	0.000322737	0	0	0	0	0	0
unidentified_Candidatus_Azambacteria	0	0	0	0	0	0	0	3.22737e-05	0.000290463	0.000161368
Amaricoccus	0	0	0	0	0	0	0	0	0.000290463	0
IheB3-7	3.22737e-05	0	0.000161368	0.000290463	0.000193642	0	0	3.22737e-05	9.6821e-05	0
unidentified_Candidatus_Collierbacteria	0.000290463	0	0	0	0	0	0	0	0	0
Hahella	0	0	9.6821e-05	0.000193642	0.000290463	0	0	0	0	0
Rhodopila	0	0	0	0.000290463	0	0	0	0	0	0
Candidatus_Contendobacter	0	0	0	0	0.000290463	0	0	0	0	0
Chitinimonas	3.22737e-05	0	0	0	0	0	0	0	0.000290463	0
unidentified_Lineage_IIa	0	0	0	0	0	0.000225916	0	0.000290463	0	6.45474e-05
unidentified_Alphaproteobacteria	0	3.22737e-05	0	0	6.45474e-05	0.000290463	0	0	0	0.000129095
Leptothrix	0	0	0	0	0	0	0	0	0	0.000290463
UTBCD1	0	0	3.22737e-05	0	0	0	0	0.000290463	0	0
Pelosinus	0	0	0	0	0	0	0.000290463	0	0	0
Edaphobaculum	0	0	6.45474e-05	0	6.45474e-05	9.6821e-05	0	9.6821e-05	0.000290463	0
Rice_Cluster_I	0.000258189	0.000225916	0	0	0	0.000290463	9.6821e-05	0	0	0
Ochrobactrum	0	0	0	0	0.000290463	0	0	0	0	0
Porticoccus	0.000161368	0	0	6.45474e-05	0	0	0	0	0	0.000290463
Oligoflexus	0	0.000193642	0	9.6821e-05	0.000225916	0	0	0.000161368	0.000290463	0
MSBL7	0	0	0.000290463	6.45474e-05	0.000193642	0	0.000258189	0	0.000225916	0
unidentified_Candidatus_Liptonbacteria	0	0	0	0	0	9.6821e-05	0	0	0	0.000290463
Desulfopila	0	0	9.6821e-05	0	0.000290463	0	3.22737e-05	0	0	0.000129095
Methylibium	0.000290463	0	0	0	0	0	0	0	0.000258189	0.000225916
JGI_0001001-H03	0	0	0	0.000129095	9.6821e-05	0.000161368	0	0	0	0.000290463
Candidatus_Methanomethylicus	0.000161368	0.000225916	0	0.000129095	0	0	0.000290463	0	0	0
Planktothrix_NIVA-CYA_15	0.000290463	0	0	0	3.22737e-05	0	0	0	0	0
Adhaeribacter	0	0	0.000290463	0	0.000129095	0.000193642	0	0	0.000193642	0
Leeia	0	0	0	0	0	0	0.000129095	0	0	0.000290463
Tagaea	0	0	0	0	3.22737e-05	0.000290463	0	0	0	0
Allorhizobium-Neorhizobium-Pararhizobium-Rhizobium	9.6821e-05	0	0	0.000161368	3.22737e-05	0	0	0	0.000290463	0
Methylocystis	0	0	0	0	0	0	0	0	0.000290463	0
Oleiphilus	0	0	0	0.000290463	9.6821e-05	0	0	0	0	0
Hyphomonas	0	0	0	6.45474e-05	0.000290463	0	0	0	0	0
Spirochaeta_2	0	0	3.22737e-05	0	0.000258189	0	0	0	3.22737e-05	0
DEV114	0	0	0	0	0.000258189	0.000193642	0	0	3.22737e-05	0
Mariprofundus	0	0.000258189	0	0	0	0	0	0.000129095	0	0
Thioploca	0	0	0	0	0	0	0	0.000258189	0	0
Lewinella	0	0	0	0.000258189	0	0	0	0	0	0
Diaphorobacter	0	0.000258189	0	0	0	0	0	0	0	0
Sva0996_marine_group	0	0	0	0	0	0.000258189	0	0	0	0
Sunxiuqinia	0	0	0	0	0	0	0.000258189	0	0	0
unidentified_WOR-1	0	0	0	0	0	0	0	0	0	0.000258189
Massilia	0	0.000258189	0	0	0	0	0	3.22737e-05	0	0
Acetobacterium	0	0	0	0	0	0	0.000258189	0	0	0
Microvirga	0	0.000193642	0	0	0	0.000161368	0	0.000225916	0.000258189	9.6821e-05
possible_genus_04	0	0	0	0	0	0	0	0	0	0.000225916
Desulfitobacterium	0	0	0	0	0	0	0.000225916	0	0	0
Butyrivibrio	0	0	0	0	0	0	0.000225916	0	0	0
Romboutsia	0	9.6821e-05	0	0	0	0	0.000225916	0	0	3.22737e-05
Haloimpatiens	0	0	0	0	0	0	0.000225916	0	0	0
Candidatus_Methylomirabilis	0	0	0	0	0	0	0	0	0	0.000225916
Defluviitaleaceae_UCG-011	0	0	0.000225916	0	0	0	0	0	0.000161368	0
Aquaspirillum	0	6.45474e-05	0	0	0	0	0.000225916	0	0	0
Blautia	0	0	0	0	0	0	0	0	0	0.000225916
Rhizobacter	0	0	0	0.000161368	0	0.000161368	0	0.000225916	0	0
Georgfuchsia	0	0	0	0	0	0	9.6821e-05	0	0.000225916	0
Macromonas	0	0.000225916	0	0	0.000161368	0	0.000193642	0	0	0
Proteocatella	6.45474e-05	0	0.000193642	0	0	0	0.000225916	0	0	0
Methylogaea	0	0.000225916	0.000225916	0	0	0	6.45474e-05	0.000161368	9.6821e-05	0
unidentified_WWE3	0.000193642	0	0	0	0	0	0	0	0	0.000225916
Ruminococcus	0	0	0	0	0	0	0.000225916	6.45474e-05	0	0
Rhodoferax	0	0	0.000225916	0	0	0	0	0	0.000193642	0
Saccharofermentans	0	0	0	0	0	0	0.000225916	0	0	0
HSB_OF53-F07	0.000225916	0	0	0	0	0	0	0	0	0
Anaerobium	0	0	0	0	0	0	0.000225916	0	0	0
Paludicola	0	0	0	0	0	0	0.000225916	0	0	0
Fictibacillus	0	0	0	0	0.000225916	0	0	0	0.000129095	9.6821e-05
Marmoricola	9.6821e-05	0	0	0	0.000225916	0	0	0	0	0
Candidatus_Magnetoovum	0	0	0	0	0	0	0.000225916	0	0	0
Sporocytophaga	0	0	0	0	0	0	0	0.000225916	0	3.22737e-05
Labrys	0	0	0	0	0	0	0	0.000225916	0	6.45474e-05
Pseudenhygromyxa	0	0	0	0	0	0	0	0.000225916	0	0
Candidatus_Latescibacter	0	6.45474e-05	0	0	9.6821e-05	0.000193642	6.45474e-05	3.22737e-05	6.45474e-05	3.22737e-05
Clostridium_sensu_stricto_11	0	0	0	0	0	0	0.000193642	0	9.6821e-05	0
unidentified_Pedosphaeraceae	6.45474e-05	0	0	0	0	0	0.000193642	0	0	0
unidentified_Hydrogenedensaceae	0	0	0	0.000193642	0	0	0	0	0	0
Intestinibacter	0	0	0	0	0.000193642	0	0	0	0	0
Pleurocapsa_PCC-7319	0	0	0	0	0	0	0.000193642	0	0	0
Immundisolibacter	0	0	0	9.6821e-05	0	0	0	0	0	0.000193642
Bosea	0	0	0	0	0.000193642	0	0	0.000129095	0	0
unidentified_67-14	0	0	3.22737e-05	3.22737e-05	0.000193642	0	0	0	0	0
Confluentibacter	0	0	0	0	0.000193642	0	0	0	0	0
unidentified_Babeliales	9.6821e-05	0	0.000193642	0	0	0	3.22737e-05	0	0	0
Neochlamydia	0	0	0.000129095	0	0.000161368	0	0	3.22737e-05	9.6821e-05	0.000193642
unidentified_Kapabacteriales	9.6821e-05	3.22737e-05	3.22737e-05	0.000193642	0	0	0	0	6.45474e-05	0
Dehalogenimonas	9.6821e-05	0	0	0	0	0.000161368	0	0.000193642	0	0
Methylovulum	0	0	0	0	0.000129095	0	0	0	0.000193642	0
unidentified_Sericytochromatia	0	9.6821e-05	0	0.000193642	0	0.000161368	0	0	3.22737e-05	0
Methyloparacoccus	0	0.000193642	6.45474e-05	9.6821e-05	0	0	0	0	0	0
Kineosporia	0	0	0	0	0.000193642	0.000193642	0	0	0	0
SCGC-AB-539-J10	0.000193642	0	0	0	0	0	0	0	0	0
Candidatus_Nitrocosmicus	0	0	0	0	0	0	0	0	0.000193642	0
unidentified_GIF3	0	0	0.000193642	0	0	0	0	0	0	0
unidentified_Rokubacteriales	0	0	0	0.000193642	0	0	0	0	0	9.6821e-05
Enterobacter	0	0	0	0	0.000193642	0	0.000193642	0	0	0
Aquimonas	0	0	0	0	0.000193642	0	0	0	0	0
Youngiibacter	0	0	9.6821e-05	0	0	0	0.000193642	0	0	0
unidentified_RBG-13-46-9	0.000193642	0	0.000193642	0	0	0	0	0.000161368	9.6821e-05	6.45474e-05
Thiothrix	0	0	0	0	0.000193642	0	0	0	0	0
Papillibacter	0	0	0	0	0	0	0.000193642	0	0	0
Sediminibacterium	0	0	3.22737e-05	0	0	0	0	0	0.000193642	6.45474e-05
Limibaculum	0	0	0	0	0	0	0	0.000193642	0	0
Pelolinea	6.45474e-05	0.000193642	0	9.6821e-05	0.000161368	0	0	0	0	6.45474e-05
Polycyclovorans	0	0	0	0	0	0.000193642	0	0	0	0
Anaerofilum	0	0	0	0	0	0	0.000193642	0	0	0
Methyloterricola	0	9.6821e-05	0	0	0	0	0.000193642	0	0	0
Blastocatella	0	0	0	0	0	0.000193642	0	0.000129095	0	0
Candidatus_Moduliflexus	0	0	6.45474e-05	0	0.000193642	0	0	0	0.000161368	0
JTB255_marine_benthic_group	0	0	0	0	0	0.000193642	0	6.45474e-05	0	0
Candidatus_Nitrososphaera	0	0	0	0.000193642	0	0	0	0	9.6821e-05	0
unidentified_Anaerolineae	0	0	0	0	0.000193642	0	0	0	0	0
Tumebacillus	0	9.6821e-05	0	0	0	0	0	3.22737e-05	0.000193642	0
Desulforegula	0	0	0	0.000193642	0	0	0	0	0	0
Methylococcus	0	0	0	0	0	0	0.000193642	0	0	0.000129095
Anaerocolumna	0	0	0	0	0	0	0.000193642	0	0	0
Litorilinea	0	0	0	0	0	0.000193642	0	0	6.45474e-05	3.22737e-05
Sediminispirochaeta	0	0	0	0	0.000193642	0	0	0	0	0
LCP-80	0	0	0.000161368	6.45474e-05	0	0	0	6.45474e-05	0	0
Oerskovia	0	0	0	0	0	0.000161368	0	0	0	0
SEEP-SRB1	0.000129095	0	9.6821e-05	9.6821e-05	0.000161368	0	6.45474e-05	0	0	0
unidentified_Candidatus_Woesebacteria	0	0	0	0	0	0	0	0	0.000161368	0.000129095
Niastella	0	0	0	0	0.000161368	0	0	3.22737e-05	0.000129095	0
unidentified_661239	0	0	0	0	0	0	0	0.000161368	0	9.6821e-05
BIyi10	0	6.45474e-05	0	0.000161368	0	0	0	0	0	9.6821e-05
unidentified_WPS-2	0	0	0	0	0	0	0	0.000161368	0	9.6821e-05
Cyanothece_PCC-8801	0	0	0	0	0.000161368	0	0	0	0	0
Silvanigrella	0	0	0	0	0	0	0	0.000161368	0	0
unidentified_Edwardsbacteria	0.000161368	0.000161368	0	0	0	0	0	0	3.22737e-05	0
Maricaulis	0	0	0	0	0	0.000161368	0	0	0	0
Pir4_lineage	0	0	0	0	0	0	0	0.000161368	6.45474e-05	0
UCG-009	0	0	0	0	0	0	0.000161368	0	0	0
Turneriella	0	0.000129095	0	0	0	0	6.45474e-05	0.000161368	0	9.6821e-05
Anaerofustis	0	0	0	0	0.000161368	0	0	0	0	0
Clostridium_sensu_stricto_16	0	0	0	0	0	0	0.000161368	0	0	0
Polynucleobacter	0.000161368	0	0	0	0	0	0	0	0	0
Syntrophobotulus	0	0	0	0	0	0	0.000161368	0	0	0
unidentified_Sumerlaeia	0	0	6.45474e-05	0.000161368	0	0	0	0	0	0
Mangroviflexus	0	0	0	0	0.000161368	0	0	0	0	0
Anabaena_XPORK15F	0	0	0	0.000161368	0	0	0	0	0	0
unidentified_Blfdi19	0	0	0	0	9.6821e-05	0	0	9.6821e-05	0	0.000161368
Tolypothrix	0	0	0	0	0	0	0	0	0.000161368	0
Patulibacter	0	0	0	0	0	0	0	0	0	0.000161368
unidentified_Latescibacterota	0	0	0	0	0	0	3.22737e-05	0	0	0.000161368
Rhodovastum	0	0.000161368	6.45474e-05	0	0	0	0	9.6821e-05	0	0
alphaI_cluster	0	0	0.000161368	0	9.6821e-05	0	0	0	0	0
Mangrovibacterium	0	0	9.6821e-05	0	0.000161368	0.000161368	0	0	0	0
unidentified_Candidatus_Zambryskibacteria	0	0	0	0	0	0	0	0.000161368	9.6821e-05	0
Hydrogenoanaerobacterium	0	0	0	0	0	0	0.000129095	0	0	0
Rhodococcus	0	0	0	0	0.000129095	0	0	0	0	0
unidentified_Rhodanobacteraceae	0	0	0.000129095	0	0	0	0	0	0	0
Clostridium_sensu_stricto_13	0	0	0.000129095	0	0	0	0	0	0	0
Cryptanaerobacter	0	0	0	0	0	0	0.000129095	0	0	0.000129095
Lacibacterium	0	0	0	0	0	0	0	0	0.000129095	0
Methanolobus	0	0.000129095	0	0	0	0	9.6821e-05	0	0	0
unidentified_Microscillaceae	0	0	0	0	0	0.000129095	0	0	0	0
Z114MB74	6.45474e-05	0	0	0	0	0	0.000129095	3.22737e-05	0	9.6821e-05
Alkanindiges	0	0	9.6821e-05	0.000129095	0	0	0	0	0	0
Conexibacter	3.22737e-05	6.45474e-05	0	0	9.6821e-05	0	0	0	0	0.000129095
Streptosporangium	0	0	0	0.000129095	0	0	0	0	0	0
KD3-10	0	0	0	0	0	0	0	9.6821e-05	0	0.000129095
Rubritepida	0	0	0	0	0	0	0	0	0.000129095	0
Parafilimonas	0	0	0	0	0	9.6821e-05	0	0	0.000129095	0
Pseudohongiella	3.22737e-05	0	0	3.22737e-05	0.000129095	9.6821e-05	0	0	0	0
Burkholderia-Caballeronia-Paraburkholderia	0	0	0	0	0	0	0	0.000129095	0	0
Candidatus_Chloroploca	0	0	0	0	0	0.000129095	0	0	0	0
BRH-c57	0	0	0	0	0	0.000129095	0	0	0	0
Selenomonas	0	0	0	0	0	0	0.000129095	0	0	0
Acanthopleuribacter	0	0	0	0	0	0	0	0	0	0.000129095
AAP99	0	0	0	0.000129095	0	0	0	0	0	0
SM23-31	0	0	0	0	0	0	6.45474e-05	6.45474e-05	0	0.000129095
unidentified_Candidatus_Colwellbacteria	0	0	0	0	0	0	0	0.000129095	6.45474e-05	0
TM7a	0	0	0	0	0	0.000129095	0	0	0	0
Candidatus_Aenigmarchaeum	3.22737e-05	3.22737e-05	9.6821e-05	0	0	0	0	0	0	0.000129095
[Eubacterium]_siraeum_group	0	0	0	0	0	0	0.000129095	0	0	0
C1-B045	0	0	9.6821e-05	0	0.000129095	0	0	0	3.22737e-05	0
Novispirillum	0	0.000129095	0	0	0	0	0	0	0	0
Alishewanella	0	0	0	0	0.000129095	0	0	0	0	0
Pirellula	0	0	0	0	9.6821e-05	0	0	0	9.6821e-05	6.45474e-05
Rhodomicrobium	0	0	0	0	0	0	0	9.6821e-05	0	0
Solirubrobacter	0	0	0	0	0	0	0	0	9.6821e-05	3.22737e-05
Gottschalkia	0	0	0	0	0	0	0	0	9.6821e-05	0
Tahibacter	0	0	0	0	0	9.6821e-05	0	0	0	0
UBA6140	0	0	0	0	9.6821e-05	0	9.6821e-05	0	0	0
Oscillibacter	0	0	0	0	0	0	9.6821e-05	0	0	0
Sphaerospermopsis_BCCUSP55	0	0	0	0	0	0	9.6821e-05	0	0	0
Desulfatiferula	0	0	0	0	9.6821e-05	0	0	9.6821e-05	0	0
Flavisolibacter	9.6821e-05	0	0	0	0	0	0	0	0	0
unidentified_Rikenellaceae	0	0	0	0	0	9.6821e-05	0	0	0	0
Beggiatoa	0	0	6.45474e-05	0	9.6821e-05	0	0	0	0	0
Clostridium_sensu_stricto_5	9.6821e-05	0	0	0	0	0	0	0	0	0
Blastopirellula	0	0	0	0	9.6821e-05	0	0	0	0	0
Williamsia	0	0	0	0	0	0	0	0	0	9.6821e-05
Aureispira	0	0	0	0	0	6.45474e-05	0	9.6821e-05	0	0
Methylomagnum	0	0	0	0	0	0	0	0	9.6821e-05	0
unidentified_Pleomorphomonadaceae	0	0	0	9.6821e-05	0	0	0	0	0	0
unidentified_Acidimicrobiia	0	0	0	0	0	0	0	0	0	9.6821e-05
Paraclostridium	0	0	0	0	0	0	0	9.6821e-05	0	0
M2PT2-76_termite_group	0	6.45474e-05	0	0	9.6821e-05	0	0	0	9.6821e-05	3.22737e-05
Candidatus_Captivus	0	0	0	0	0	0	0	0	0	9.6821e-05
Ellin517	0	0	0	0	9.6821e-05	6.45474e-05	0	0	0	3.22737e-05
Tropicimonas	0	0	0	0	9.6821e-05	0	0	0	0	0
IheB2-23	0	0	0	0	0	0	0	0	0	9.6821e-05
unidentified_Absconditabacteriales_(SR1)	9.6821e-05	0	0	0	0	0	0	0	0	0
unidentified_TK10	3.22737e-05	0	0	0	0	0	0	0	0	9.6821e-05
Methylocaldum	0	0	9.6821e-05	0	6.45474e-05	0	0	9.6821e-05	6.45474e-05	6.45474e-05
Chroococcidiopsis_PCC_7203	0	9.6821e-05	0	0	0	0	0	0	0	0
Actinotalea	0	0	0	0	0	9.6821e-05	0	0	0	0
Leptolyngbya_ANT.L52.2	0	9.6821e-05	0	0	0	9.6821e-05	0	0	0	0
Dielma	0	0	0	0	0	0	9.6821e-05	0	0	0
Acholeplasma	0	0	0	0	0	9.6821e-05	0	0	0	0
Myxococcus	0	9.6821e-05	0	0	0	0	0	0	0	0
Verruc-01	0	0	0	0	0	0	9.6821e-05	0	0	0
Alkaliphilus	0	0	0	0	0	0	0	0	9.6821e-05	0
Clostridium_sensu_stricto_6	0	0	0	0	0	0	0	0	9.6821e-05	0
unidentified_Gaiellales	0	0	0	0	0	0	0	0	9.6821e-05	0
Parasegetibacter	3.22737e-05	9.6821e-05	3.22737e-05	0	0	0	0	0	3.22737e-05	0
unidentified_Micavibrionales	0	0	0	0	0	0	0	0	9.6821e-05	0
Arcobacter	0	0	0	0	9.6821e-05	0	0	0	0	0
Legionella	0	6.45474e-05	0	9.6821e-05	0	0	3.22737e-05	0	0	0
Silanimonas	0	9.6821e-05	0	0	0	0	0	3.22737e-05	0	0
Thermincola	0	0	0	0	0	9.6821e-05	0	0	3.22737e-05	0
unidentified_Mitochondria	3.22737e-05	0	0	9.6821e-05	0	0	0	0	0	0
Blastococcus	0	0	0	9.6821e-05	0	9.6821e-05	0	0	0	0
Anaerolineaceae_UCG-001	0	0	0	9.6821e-05	0	0	0	0	0	0
unidentified_Candidatus_Yanofskybacteria	0	0	0	0	0	0	0	0	0	9.6821e-05
unidentified_Desulfosarcinaceae	0	0	0	0	0	0	0	0	9.6821e-05	0
Salinispira	6.45474e-05	6.45474e-05	0	0	0	9.6821e-05	0	0	6.45474e-05	0
Roseobacter_clade_CHAB-I-5_lineage	0	0	0	0	0	0	0	9.6821e-05	6.45474e-05	0
Geminicoccus	0	0	0	0	0	0	0	9.6821e-05	0	0
Candidatus_Ovatusbacter	0	0	0	0	9.6821e-05	0	0	0	0	0
Yangia	0	0	9.6821e-05	0	0	0	0	0	0	0
Ornatilinea	0	0	0	0	0	0	9.6821e-05	0	0	0
Meiothermus	0	0	0	9.6821e-05	0	0	0	0	0	3.22737e-05
Pseudanabaena_PCC-6802	9.6821e-05	0	0	0	0	0	0	0	0	0
Solitalea	6.45474e-05	0	0	0	0	9.6821e-05	0	0	9.6821e-05	0
unidentified_Candidatus_Lloydbacteria	0	0	0	0	0	0	9.6821e-05	0	0	0
unidentified_A0839	0	0	0	6.45474e-05	0	0	0	9.6821e-05	0	0
hgcI_clade	0	6.45474e-05	0	9.6821e-05	0	0	6.45474e-05	0	0	0
Alsobacter	0	0	0	0	0	0	9.6821e-05	0	0	0
Pelagibius	0	0	0	0	0	9.6821e-05	0	0	0	0
Erysipelatoclostridium	0	0	9.6821e-05	0	0	0	0	0	0	0
unidentified_Vicinamibacteraceae	0	0	0	0	0	9.6821e-05	0	0	0	9.6821e-05
unidentified_Rhodospirillales	0	0	0	0	0	0	0	3.22737e-05	6.45474e-05	0
Desulfosporosinus	0	0	0	0	3.22737e-05	0	0	0	0	6.45474e-05
Candidatus_Paracaedibacter	0	0	0	0	6.45474e-05	0	0	0	0	0
unidentified_RBG-16-55-12	0	0	0	0	0	0	6.45474e-05	0	0	0
Longivirga	0	0	0	0	0	0	0	6.45474e-05	0	0
unidentified_Nitrosopumilaceae	0	0	0	0	6.45474e-05	0	0	0	0	0
unidentified_Candidatus_Moranbacteria	0	0	0	0	6.45474e-05	0	0	0	0	0
3PJM14	0	0	0	0	0	6.45474e-05	0	0	0	0
Nitrosospira	0	0	6.45474e-05	0	0	0	0	0	0	0
Dietzia	6.45474e-05	0	0	0	0	0	0	0	0	0
Pseudoflavitalea	0	0	0	0	0	6.45474e-05	0	0	0	0
Oscillochloris	0	0	0	0	0	6.45474e-05	0	0	0	0
Xanthobacter	0	0	0	0	0	0	0	0	0	6.45474e-05
unidentified_Berkelbacteria	6.45474e-05	0	0	0	0	0	0	0	0	3.22737e-05
unidentified_IMCC26256	0	6.45474e-05	0	0	0	0	0	0	0	0
Dyadobacter	6.45474e-05	0	0	0	0	0	0	0	0	0
Dysgonomonas	0	0	0	0	0	0	6.45474e-05	0	0	0
Chloronema	0	0	0	0	0	6.45474e-05	0	0	0	0
Emticicia	0	0	0	0	0	0	6.45474e-05	0	0	0
Candidatus_Nitrosotalea	6.45474e-05	0	0	0	0	0	0	0	0	0
unidentified_Methylacidiphilaceae	0	0	0	0	0	0	0	0	0	6.45474e-05
Exiguobacterium	6.45474e-05	0	0	0	0	0	0	0	0	0
Terrimicrobium	0	0	0	0	0	0	6.45474e-05	0	0	0
Candidatus_Koribacter	6.45474e-05	0	0	0	0	0	6.45474e-05	0	6.45474e-05	0
MIZ17	0	0	0	0	0	0	0	0	0	6.45474e-05
unidentified_0319-6G20	0	0	0	0	0	0	0	0	3.22737e-05	6.45474e-05
unidentified_Pirellulaceae	0	0	0	0	6.45474e-05	0	0	0	0	0
Shewanella	0	0	6.45474e-05	0	0	0	0	3.22737e-05	0	0
Candidatus_Jidaibacter	0	6.45474e-05	0	0	0	0	0	0	0	0
Dickeya	0	0	0	0	0	0	6.45474e-05	0	0	0
Sorangium	0	0	0	0	0	0	0	0	6.45474e-05	0
Micropepsis	0	0	0	0	0	0	6.45474e-05	0	0	0
Phreatobacter	0	0	0	6.45474e-05	0	0	0	0	0	0
Gemmata	0	0	0	0	0	0	0	3.22737e-05	6.45474e-05	0
Caproiciproducens	6.45474e-05	0	0	0	0	0	0	0	0	0
Stella	0	6.45474e-05	0	0	6.45474e-05	0	0	0	0	0
Sporichthya	0	0	6.45474e-05	0	0	0	0	0	0	0
Paenibacillus	0	3.22737e-05	0	0	0	0	0	0	6.45474e-05	0
possible_genus_03	0	0	0	0	0	0	6.45474e-05	0	0	0
Sandarakinorhabdus	0	0	0	0	6.45474e-05	0	0	0	0	0
unidentified_Proteobacteria	0	0	0	0	0	0	0	6.45474e-05	0	0
Rubrobacter	0	3.22737e-05	0	0	0	0	0	0	0	0
Spongiibacter	3.22737e-05	0	0	0	0	0	0	0	0	0
unidentified_NS11-12_marine_group	0	3.22737e-05	0	0	0	0	0	0	0	0
Estrella	3.22737e-05	0	0	0	0	0	0	0	0	0
unidentified_Kazania	0	0	0	3.22737e-05	0	0	0	0	3.22737e-05	0
Chlorobium	0	0	0	3.22737e-05	0	0	0	0	0	0
Oscillatoria_PCC-10802	0	0	0	0	0	0	0	0	0	3.22737e-05
Roseimicrobium	0	0	0	0	0	3.22737e-05	0	0	0	0
Chryseobacterium	0	0	3.22737e-05	0	0	0	0	0	0	0
Desulforhopalus	0	0	0	0	3.22737e-05	0	0	0	0	0
Anaerostipes	0	0	0	0	0	0	0	0	0	3.22737e-05
Thermoactinomyces	0	0	0	0	0	0	0	0	3.22737e-05	0
Nodosilinea_PCC-7104	0	0	0	0	3.22737e-05	0	0	0	0	0
Geitlerinema_PCC-7105	0	0	0	0	0	0	3.22737e-05	0	0	0
unidentified_Marinifilaceae	0	0	0	0	3.22737e-05	3.22737e-05	0	3.22737e-05	0	0
Methylonatrum	3.22737e-05	0	0	0	0	0	0	0	0	0
Sphingobacterium	0	0	0	0	0	0	0	0	3.22737e-05	0
Crenobacter	0	0	0	0	0	0	0	0	3.22737e-05	0
unidentified_Acetobacteraceae	0	0	0	0	0	0	3.22737e-05	0	0	0
Candidatus_Berkiella	0	0	0	0	0	0	0	0	0	3.22737e-05
Vulgatibacter	0	0	0	0	3.22737e-05	0	0	0	0	0
GKS98_freshwater_group	3.22737e-05	0	0	0	0	0	0	0	0	0
Prevotellaceae_UCG-004	0	0	0	0	0	0	3.22737e-05	0	0	0
Truepera	3.22737e-05	0	0	0	0	0	0	0	0	0
Puia	0	0	0	0	0	0	0	0	3.22737e-05	0
unidentified_Dadabacteriales	0	0	0	0	0	0	0	0	0	3.22737e-05
possible_genus_06	0	3.22737e-05	0	0	0	0	3.22737e-05	0	0	0
Prosthecomicrobium	0	3.22737e-05	0	0	0	0	0	0	0	0
Alcanivorax	3.22737e-05	0	0	0	0	0	0	0	0	3.22737e-05
Cetobacterium	3.22737e-05	0	0	0	0	0	0	0	0	0
Candidatus_Turbabacter	0	0	0	3.22737e-05	0	0	0	0	0	0
unidentified_Vermiphilaceae	0	0	0	0	0	0	0	0	0	3.22737e-05
Chthonomonas	0	0	0	0	0	3.22737e-05	0	0	0	0
Pseudogulbenkiania	0	0	0	3.22737e-05	0	0	0	0	0	0
Cerasicoccus	0	0	0	0	0	0	3.22737e-05	0	0	0
Methyloglobulus	0	3.22737e-05	0	3.22737e-05	0	0	0	0	0	0
unidentified_GWB1-42-6	0	0	0	0	0	0	0	0	0	3.22737e-05
Verrucomicrobium	0	0	0	0	3.22737e-05	0	0	0	0	0
unidentified_Candidatus_Peribacteria	3.22737e-05	0	3.22737e-05	0	0	3.22737e-05	0	0	0	3.22737e-05
unidentified_Candidatus_Amesbacteria	0	0	0	0	0	0	0	3.22737e-05	0	0
Others	0.422301	0.561982	0.470421	0.541649	0.494142	0.652574	0.352751	0.644441	0.597773	0.616234
